# Supplementary material for: Evaluation of optical properties and chemical structure changes in enzymatic hydrolysis lignin during heat treatment
Source: Royal Society of Chemistry journal article supplement (doi:10.1039/c7ra02005h), 2017-01-01
Supplement: c7ra02005h1.pdf [file c7ra02005h1.pdf]

## Supporting Information

Supporting information only for reviewer.

The FTIR figure (Fig. 4) was drawn in off scale mode. It is difficult to recognize the variation tendency of absorption peaks with increasing treat temperature and duration. Therefore, we drew Figure S1 and Figure S2 for a better observation of variation tendency of absorption peak. However, it only exhibited a part of absorption peaks, and it just for review.

A decreasing intensity is observed in the absorption peaks located at  $1514\text{ cm}^{-1}$ ,  $1463\text{ cm}^{-1}$ ,  $1425\text{ cm}^{-1}$ ,  $1150\text{ cm}^{-1}$ ,  $1033\text{ cm}^{-1}$  and  $835\text{ cm}^{-1}$  with increasing temperature and duration of heat treatment. However, the peak at  $1173\text{ cm}^{-1}$  showed a slight increase.

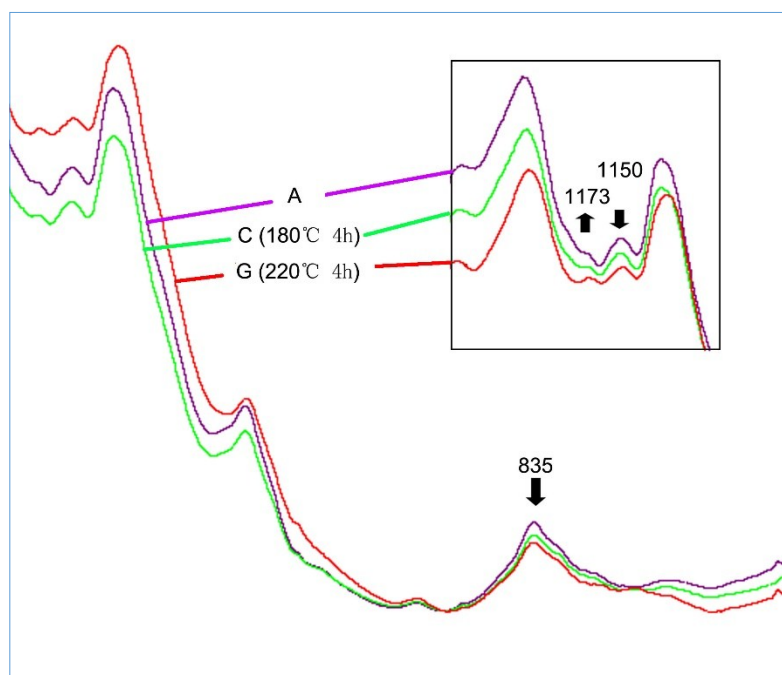

Figure S1 The variation tendency of absorption peak located at  $1173\text{ cm}^{-1}$ ,  $1150\text{ cm}^{-1}$ , and  $835\text{ cm}^{-1}$ . Sample A without heat treatment, sample C treated at the temperature of  $180^\circ\text{C}$  for 4 h, sample G treated at the temperature of  $220^\circ\text{C}$  for 4 h.

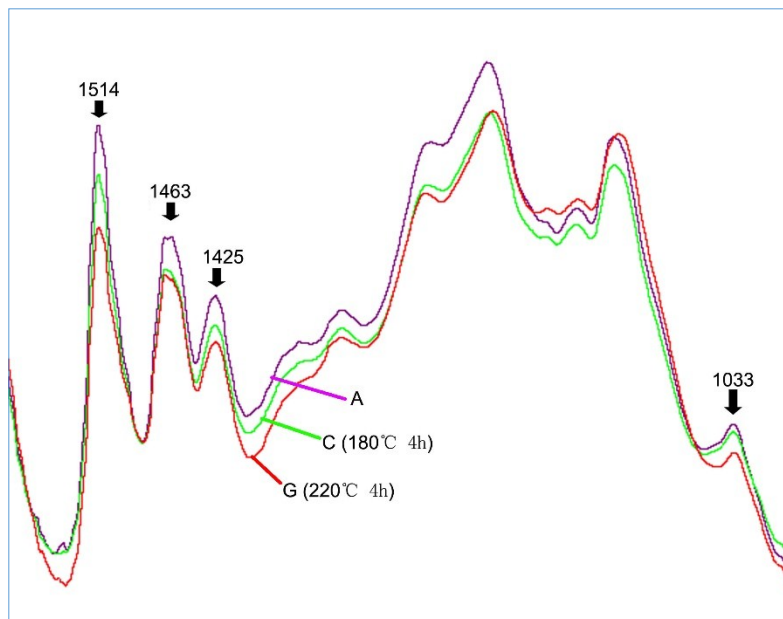

Figure S2 The variation tendency of absorption peak located at  $1514\text{ cm}^{-1}$ ,  $1463\text{ cm}^{-1}$ ,  $1425\text{ cm}^{-1}$ , and  $1033\text{ cm}^{-1}$ . Sample A without heat treatment, sample C treated at the temperature of  $180\text{ }^{\circ}\text{C}$  for 4 h, sample G treated at the temperature of  $220\text{ }^{\circ}\text{C}$  for 4 h.
